# Supplementary material for: The cardiopharyngeal mesoderm contributes to lymphatic vessel development in mouse
Source: eLife. 2022 Oct 5;11:e81515. doi: 10.7554/eLife.81515 (PMC9560160; doi:10.7554/eLife.81515)
Supplement: Figure 1—source data 1. [file elife-81515-fig1-data1.xlsx]

## Sheet: Sheet1
The ratio of tdTomato/VEGFR3 area (%)	embryo 1	VEGFR3+ area (μm2)	VEGFR3+ area (μm2) (average of 2sections)	tdTomato+ area (μm2)	tdTomato+ area (μm2) (average of 2sections)	VEGFR3/tdTomato area *100 (%)
Isl1Cre/+;Rosa26tdTomato/+ E16.5
(μm2)
tongue		2878.1	2776.1	1510.89	1514.78	54.5651
		2674.1		1518.68
larynx		5326.5	5622.4	3381.86	3579.86	63.6714
		5918.3		3777.85
lower skin		782.87	676.875	564.368	462.266	68.2941
		570.88		360.164
cardiac lymphatic vessel around the OFT		295.23	299.232	220.223	217.213	72.5902
		303.234		214.203
dorsal cardiac lymphatic vessel		71.2	68.198	0	0	0
		65.196		0
	embryo 2	VEGFR3+ area (μm2)	VEGFR3+ area (μm2) (average of 2sections)	tdTomato+ area (μm2)	tdTomato+ area (μm2) (average of 2sections)	VEGFR3/tdTomato area *100 (%)
tongue		2759.12	2656.11	1426.77	1416.76	53.3397
		2553.1		1406.76
larynx		560.168	547.188	404.18	403.181	73.6824
		534.208		402.182
lower skin		1572.72	1461.71	1095.56	1185.54	81.1063
		1350.7		1275.52
cardiac lymphatic vessel around the OFT		150.9	138.8	98	94.035	67.7486
		126.7		90.037
dorsal cardiac lymphatic vessel		110.495	206.397	0	0	0
		302.299		0
	embryo 3	VEGFR3+ area (μm2)	VEGFR3+ area (μm2) (average of 2sections)	tdTomato+ area (μm2)	tdTomato+ area (μm2) (average of 2sections)	VEGFR3/tdTomato area *100 (%)
tongue		1520.5	1531.7	988.508	978.409	63.8773
		1543.9		968.31
larynx		925.9	943.9	849.645	739.665	78.3626
		961.9		629.685
lower skin		1115.72	1124.72	1108.41	1048.41	93.215
		1133.72		988.411
cardiac lymphatic vessel around the OFT		469.695	468.576	400.351	396.371	84.5905
		467.457		392.391
dorsal cardiac lymphatic vessel		151.507	143.607	0	0	0
		135.707		0
