# Supplementary material for: The cardiopharyngeal mesoderm contributes to lymphatic vessel development in mouse
Source: eLife. 2022 Oct 5;11:e81515. doi: 10.7554/eLife.81515 (PMC9560160; doi:10.7554/eLife.81515)
Supplement: Figure 2—figure supplement 1—source data 1. [file elife-81515-fig2-figsupp1-data1.xlsx]

## Sheet: Sheet1
The ratio of tdTomato/VEGFR3 area (%)	embryo 1	VEGFR3+ area (μm2)	VEGFR3+ area (μm2) (average of 2sections)	tdTomato+ area (μm2)	tdTomato+ area (μm2) (average of 2sections)	VEGFR3/tdTomato area *100 (%)
Isl1CreERT2/+;Rosa26tdTomato/+ E16.5 TM @E6.5
(μm2)
tongue		986.996	1086.99	926.6	726.3	66.8173
		1186.99		526
larynx		5596.94	5494.94	2343	2532.9	46.0951
		5392.94		2722.8
lower skin		590.146	586.143	629.163	528.161	90.1079
		582.14		427.159
cardiac lymphatic vessel around the OFT		237.509	247.557	157.961	167.941	67.8393
		257.605		177.921
dorsal cardiac lymphatic vessel		117.2	127.5	0	0	0
		137.8		0
	embryo 2	VEGFR3+ area (μm2)	VEGFR3+ area (μm2) (average of 2sections)	tdTomato+ area (μm2)	tdTomato+ area (μm2) (average of 2sections)	VEGFR3/tdTomato area *100 (%)
tongue		1305.3	1325.31	961.5	941.457	71.0369
		1345.31		921.414
larynx		940.71	839.709	888.3	688.292	81.9679
		738.708		488.284
lower skin		1160.72	1060.73	984.9	974.904	91.9091
		960.732		964.908
cardiac lymphatic vessel around the OFT		365.53	369.532	299.4	288.415	78.0487
		373.534		277.43
dorsal cardiac lymphatic vessel		80.3	61.288	0	0	0
		42.276		0
