# Supplementary material for: The cardiopharyngeal mesoderm contributes to lymphatic vessel development in mouse
Source: eLife. 2022 Oct 5;11:e81515. doi: 10.7554/eLife.81515 (PMC9560160; doi:10.7554/eLife.81515)
Supplement: Figure 2—source data 1. [file elife-81515-fig2-data1.xlsx]

## Sheet: Sheet1
The ratio of tdTomato/VEGFR3 area (%)	embryo 1	VEGFR3+ area (μm2)	VEGFR3+ area (μm2) (average of 2sections)	tdTomato+ area (μm2)	tdTomato+ area (μm2) (average of 2sections)	VEGFR3/tdTomato area *100 (%)
Isl1CreERT2/+;Rosa26tdTomato/+ E16.5 TM @E8.5
(μm2)
tongue		1801.75	1903.74	1414.72	1404.52	73.7769
		2005.73		1394.32
larynx		3181.8	3265.7	901.346	1001.34	30.6624
		3349.61		1101.34
lower skin		1398.6	1406.6	398.407	394.467	28.044
		1414.6		390.527
cardiac lymphatic vessel around the OFT		368	366.128	120.07	118.07	32.2483
		364.256		116.07
dorsal cardiac lymphatic vessel		203.892	194.881	0	0	0
		185.87		0
	embryo 2	VEGFR3+ area (μm2)	VEGFR3+ area (μm2) (average of 2sections)	tdTomato+ area (μm2)	tdTomato+ area (μm2) (average of 2sections)	VEGFR3/tdTomato area *100 (%)
tongue		2405.57	2417.58	507.915	497.917	20.5957
		2429.59		487.919
larynx		3540.58	3441.56	953.7	854.7	24.8347
		3342.54		755.7
lower skin		1390.72	1400.72	477.3	487.302	34.7895
		1410.71		497.304
cardiac lymphatic vessel around the OFT		523.9	423.91	160.83	159.831	37.704
		323.92		158.832
dorsal cardiac lymphatic vessel		210.22	208.2	0	0	0
		206.18		0
	embryo 3	VEGFR3+ area (μm2)	VEGFR3+ area (μm2) (average of 2sections)	tdTomato+ area (μm2)	tdTomato+ area (μm2) (average of 2sections)	VEGFR3/tdTomato area *100 (%)
tongue		2032.68	2142.68	755	734.076	34.2596
		2252.69		714.052
larynx		2605.1	2704.09	641.9	731.8	27.0627
		2803.09		821.7
lower skin		1844	1643.97	900.09	897.09	54.5686
		1443.93		894.09
cardiac lymphatic vessel around the OFT		770.76	750.88	284.5	264.3	35.1987
		731		244.1
dorsal cardiac lymphatic vessel		140.2	138.199	0	0	0
		136.198		0
	embryo 4	VEGFR3+ area (μm2)	VEGFR3+ area (μm2) (average of 2sections)	tdTomato+ area (μm2)	tdTomato+ area (μm2) (average of 2sections)	VEGFR3/tdTomato area *100 (%)
tongue		3903	3806.98	1960.03	2060.07	54.1128
		3710.97		2160.1
larynx		3041.41	3241.37	790.7	690.694	21.3087
		3441.33		590.688
lower skin		1890.94	1970.74	789.933	779.923	39.5752
		2050.54		769.913
cardiac lymphatic vessel around the OFT		829.1	815.1	299.713	300.733	36.8952
		801.1		301.753
dorsal cardiac lymphatic vessel		191.142	181.161	0	0	0
		171.18		0
	embryo 5	VEGFR3+ area (μm2)	VEGFR3+ area (μm2) (average of 2sections)	tdTomato+ area (μm2)	tdTomato+ area (μm2) (average of 2sections)	VEGFR3/tdTomato area *100 (%)
tongue		2799.59	2696.59	1253.2	1233.18	45.7311
		2593.58		1213.15
larynx		3687.37	3576.35	935	1034.89	28.9371
		3465.33		1134.78
lower skin		1691	1790.98	771.666	751.683	41.9705
		1890.96		731.7
cardiac lymphatic vessel around the OFT		816.502	834.302	150.848	170.746	20.4657
		852.102		190.644
dorsal cardiac lymphatic vessel		299.186	197.384	0	0	0
		95.582		0
