# Supplementary material for: The cardiopharyngeal mesoderm contributes to lymphatic vessel development in mouse
Source: eLife. 2022 Oct 5;11:e81515. doi: 10.7554/eLife.81515 (PMC9560160; doi:10.7554/eLife.81515)
Supplement: Figure 2—source data 2. [file elife-81515-fig2-data2.xlsx]

## Sheet: Sheet1
The ratio of tdTomato/VEGFR3 area (%)	embryo 1	VEGFR3+ area (μm2)	VEGFR3+ area (μm2) (average of 2sections)	tdTomato+ area (μm2)	tdTomato+ area (μm2) (average of 2sections)	VEGFR3/tdTomato area *100 (%)
Isl1CreERT2/+;Rosa26tdTomato/+ E16.5 TM @E11.5
(μm2)
tongue		1903.77	1803.66	0	0	0
		1703.56		0
larynx		2535.93	2337.93	7.506	4.506	0.192735
		2139.92		1.506
lower skin		1282.51	1274.43	0	0	0
		1266.37		0
cardiac lymphatic vessel around the OFT		305.694	410.691	0	0	0
		515.688		0
dorsal cardiac lymphatic vessel		196.269	185.267	0	0	0
		174.265		0
	embryo 2	VEGFR3+ area (μm2)	VEGFR3+ area (μm2) (average of 2sections)	tdTomato+ area (μm2)	tdTomato+ area (μm2) (average of 2sections)	VEGFR3/tdTomato area *100 (%)
tongue		1875.39	1865.39	0	0	0
		1855.39		0
larynx		2837.78	2537.88	0	0	0
		2237.97		0
lower skin		1908.6	1808.64	0	0	0
		1708.69		0
cardiac lymphatic vessel around the OFT		600.345	599.363	35.157	26.137	4.3608
		598.381		17.117
dorsal cardiac lymphatic vessel		129.999	130.989	0	0	0
		131.979		0
	embryo 3	VEGFR3+ area (μm2)	VEGFR3+ area (μm2) (average of 2sections)	tdTomato+ area (μm2)	tdTomato+ area (μm2) (average of 2sections)	VEGFR3/tdTomato area *100 (%)
tongue		1439.12	1538.21	0	0	0
		1637.31		0
larynx		2188.9	2078.9	0	0	0
		1968.9		0
lower skin		1412.64	1402.62	0	0	0
		1392.6		0
cardiac lymphatic vessel around the OFT		807.483	607.475	0	0	0
		407.467		0
dorsal cardiac lymphatic vessel		119.4	139.401	0	0	0
		159.402		0
