# Supplementary material for: The cardiopharyngeal mesoderm contributes to lymphatic vessel development in mouse
Source: eLife. 2022 Oct 5;11:e81515. doi: 10.7554/eLife.81515 (PMC9560160; doi:10.7554/eLife.81515)
Supplement: Figure 4—source data 1. [file elife-81515-fig4-data1.xlsx]

## Sheet: Sheet1
eYFP+/Prox1+ cells among Prox1+ cells in the 1st and 2nd pharyngeal arch
Tamoxifen treatment @E8.5	The number of eYFP+/Prox1+ cells	The number of eYFP+/Prox1+ cells (average of 2 sections)	The number of Prox1+ cells	The number of Prox1+ cells (average of 2 sections)	eYFP+/Prox1+ cells among Prox1+ cells *100 (%)
embryo1	8	8	17	19	42.1053
	8		21
embryo2	15	13	44	42	30.9524
	11		40
embryo3	12	12	30	30	40
	12		30
embryo4	12	13	38	40	32.5
	14		42
embryo5	6	6	15	16	37.5
	6		17
embryo6	14	13	38	38	34.2105
	12		38
Tamoxifen treatment @E9.5	The number of eYFP+/Prox1+ cells	The number of eYFP+/Prox1+ cells (average of 2 sections)	The number of Prox1+ cells	The number of Prox1+ cells (average of 2 sections)	eYFP+/Prox1+ cells among Prox1+ cells *100 (%)
embryo1	2	2	20	20	10
	2		20
embryo2	0	0	24	24	0
	0		24
embryo3	3	3	38	36	8.33333
	3		31
embryo4	1	2	33	35	5.71429
	3		37
embryo5	2	2	40	37	5.40541
	2		34
embryo6	7	8	63	61	13.1148
	9		59
