# Supplementary material for: The cardiopharyngeal mesoderm contributes to lymphatic vessel development in mouse
Source: eLife. 2022 Oct 5;11:e81515. doi: 10.7554/eLife.81515 (PMC9560160; doi:10.7554/eLife.81515)
Supplement: Figure 5—figure supplement 1—source data 1. [file elife-81515-fig5-figsupp1-data1.xlsx]

## Sheet: Sheet1
Isl1Cre/+;Prox1flox E12.5 embryos
The number of Prox1+ cells in 1st pharyngeal arch	The number of Prox1+ cells	The number of Prox1+ cells (average of 2 singleZ)
fl/+
embryo1	77	75
	73
embryo2	70	68
	66
fl/fl
embryo1	6	6
	6
embryo2	7	8
	9
