# Supplementary material for: The cardiopharyngeal mesoderm contributes to lymphatic vessel development in mouse
Source: eLife. 2022 Oct 5;11:e81515. doi: 10.7554/eLife.81515 (PMC9560160; doi:10.7554/eLife.81515)
Supplement: Figure 5—figure supplement 1—source data 2. [file elife-81515-fig5-figsupp1-data2.xlsx]

## Sheet: Sheet1
Isl1Cre/+;Prox1flox E13.5 embryos
Prox1+ cells in the lower jaw	The number of Prox1+ cells	The number of Prox1+ cells (average of 2 sections)
fl/+
embryo1	35	34
	33
embryo2	28	28
	28
embryo3	31	30
	29
fl/fl
embryo1	8	8
	8
embryo2	31	34
	37
embryo3	22	22
	22
Prox1+ cells in the tongue	The number of eYFP+/Prox1+ cells	The number of eYFP+/Prox1+ cells (average of 2 sections)
embryo1	33	34
	35
embryo2	22	25
	28
embryo3	44	45
	46
fl/fl
embryo1	0	0
	0
embryo2	5	5
	5
embryo3	0	0
	0
