# Supplementary material for: The cardiopharyngeal mesoderm contributes to lymphatic vessel development in mouse
Source: eLife. 2022 Oct 5;11:e81515. doi: 10.7554/eLife.81515 (PMC9560160; doi:10.7554/eLife.81515)
Supplement: Figure 5—source data 1. [file elife-81515-fig5-data1.xlsx]

## Sheet: Sheet1
		fl/+		fl/fl			fl/+					fl/fl					fl/+		fl/fl
	The number of lymphatic vessels						VEGFR3+ area (μm2)	GFP+ area (μm2)	VEGFR3/GFP area *100 (%)			VEGFR3+ area (μm2)	GFP+ area (μm2)	VEGFR3/GFP area *100 (%)			diameter (μm)		diameter (μm)
Isl1Cre/+;Prox1flox E16.5
The tongue	embryo1	29	embryo1	2		embryo1	1607.66	1331.21	82.804		embryo1	76.31	70.702	92.651		embryo1	4.34229	embryo1	2.9445
	embryo2	32	embryo2	16		embryo2	2131.98	2082.6	97.6834		embryo2	641.196	615.603	96.0086		embryo2	6.21656	embryo2	4.56129
	embryo3	33	embryo3	16		embryo3	1234.17	1219.99	98.8513		embryo3	897.239	684.698	76.3117		embryo3	3.76125	embryo3	3.92643
	embryo4	38	embryo4	20		embryo4	2180.58	2155.31	98.8415		embryo4	888.147	870.958	98.0646		embryo4	5.071	embryo4	4.4625
	embryo5	41	embryo5	20		embryo5	2630.99	2593.15	98.5617		embryo5	973.104	928.04	95.369		embryo5	6.03227	embryo5	5.8592
	embryo6	39				embryo6	2023.43	2012.78	99.4738							embryo6	5.30275
							fl/+					fl/fl					fl/+		fl/fl
							VEGFR3+ area (μm2)	GFP+ area (μm2)	VEGFR3/GFP area *100 (%)			VEGFR3+ area (μm2)	GFP+ area (μm2)	VEGFR3/GFP area *100 (%)			diameter (μm)		diameter (μm)
Facial lymphatic vessels	embryo1	10	embryo1	5		embryo1	853.286	779	91.2941		embryo1	756.183	50.904	6.7317		embryo1	4.51638	embryo1	3.1844
	embryo2	19	embryo2	20		embryo2	1664.9	1664.34	99.9663		embryo2	1509.28	298.673	19.7891		embryo2	8.351	embryo2	4.8162
	embryo3	20	embryo3	19		embryo3	1360.31	1340.49	98.5432		embryo3	1035.56	567.203	54.7729		embryo3	3.813	embryo3	5.21244
	embryo4	15	embryo4	15		embryo4	967.402	933.753	96.5217		embryo4	1206.83	639.105	52.9576		embryo4	5.0072	embryo4	5.1363
	embryo5	16	embryo5	22		embryo5	1580.84	1483.88	93.8664		embryo5	1061.58	380.518	35.8446		embryo5	8.34586	embryo5	4.7121
	embryo6	18				embryo6	1546.5	1448.8	93.6824							embryo6	6.75555
