# Supplementary material for: The cardiopharyngeal mesoderm contributes to lymphatic vessel development in mouse
Source: eLife. 2022 Oct 5;11:e81515. doi: 10.7554/eLife.81515 (PMC9560160; doi:10.7554/eLife.81515)
Supplement: Figure 6—figure supplement 2—source data 1. [file elife-81515-fig6-figsupp2-data1.xlsx]

## Sheet: Sheet1
		fl/+		fl/fl			fl/+					fl/fl					fl/+		fl/fl
Tek-Cre;Prox1flox E16.5		The number of lymphatic vessels					LYVE1 and PECAM+ area (μm2)	GFP+ area (μm2)	LYVE1/GFP area *100 (%)			LYVE1 and PECAM+ area (μm2)	GFP+ area (μm2)	LYVE1/GFP area *100 (%)			diameter (μm)		diameter (μm)
Tongue	embryo1	22	embryo1	11		embryo1	367.725	335.895	91.3441		embryo1	216.033	1000.34	463.05		embryo1	2.8642	embryo1	10.9762
	embryo2	20	embryo2	7		embryo2	266.056	246.712	92.7294		embryo2	209.19	481.699	230.269		embryo2	3.4282	embryo2	7.54275
	embryo3	24	embryo3	15		embryo3	741.148	740.438	99.9042		embryo3	296.859	868.153	292.446		embryo3	2.8408	embryo3	13.1728
	embryo4	22	embryo4	15		embryo4	909.181	763.568	83.9842		embryo4	637.218	1020.13	160.091		embryo4	2.294	embryo4	7.55567
	embryo5	23	embryo5	16		embryo5	409.771	402.947	98.3347		embryo5	370.192	650.825	175.807		embryo5	3.0238	embryo5	6.614
	embryo6	25	embryo6	15		embryo6	1293.18	1227.19	94.8974		embryo6	677.067	1172.2	173.129		embryo6	3.035	embryo6	6.9002
Lower jaw skin	embryo1	8	embryo1	7		embryo1	572.146	191.302	33.4359		embryo1	484.507	310.276	64.0395		embryo1	11.5196	embryo1	5.752
	embryo2	8	embryo2	17		embryo2	1151.65	372.361	32.3329		embryo2	1219.15	526.656	43.1986		embryo2	10.3558	embryo2	9.66929
	embryo3	12	embryo3	8		embryo3	1158.71	411.041	35.4741		embryo3	478.952	142.934	29.8431		embryo3	6.911	embryo3	6.1136
	embryo4	14	embryo4	7		embryo4	690.173	391.973	56.7934		embryo4	240.236	125.899	52.4064		embryo4	7.44771	embryo4	8.3818
	embryo5	11	embryo5	10		embryo5	1271.12	616.199	48.4769		embryo5	477.443	226.893	47.5225		embryo5	7.40557	embryo5	6.52
	embryo6	12	embryo6	16		embryo6	597.738	189.964	31.7805		embryo6	917.14	355.58	38.7705		embryo6	7.4982	embryo6	7.07783
			embryo7	11							embryo7	842.035	138.537	16.4526				embryo7	13.2306
			embryo8	11							embryo8	997.153	120.893	12.1238				embryo8	15.6178
Back skin	embryo1	6	embryo1	7		embryo1	871.314	201.667	23.1452		embryo1	667.438	528.835	79.2336		embryo1	12.5903	embryo1	15.3351
	embryo2	8	embryo2	8		embryo2	249.566	177.446	71.1018		embryo2	732.772	393.968	53.7641		embryo2	4.6264	embryo2	13.4943
	embryo3	7	embryo3	4		embryo3	854.714	469.129	54.8872		embryo3	388.344	30.913	7.96021		embryo3	7.129	embryo3	16.5762
	embryo4	7	embryo4	6		embryo4	307.23	275.555	89.6901		embryo4	1068.06	378.762	35.4625		embryo4	4.25171	embryo4	24.641
	embryo5	6	embryo5	4		embryo5	336.073	242.028	72.0165		embryo5	302.156	73.137	24.205		embryo5	3.70267	embryo5	11.199
	embryo6	8	embryo6	3		embryo6	514.098	232.625	45.2492		embryo6	561.721	72.641	12.9319		embryo6	4.84943	embryo6	8.9695
